# Supplementary material
Source: PubMed Central journal article supplement (PMC4828122)
Supplement: supp_the2015-0441_Supplemental_Table.pdf [file supp_the2015-0441_Supplemental_Table.pdf]

Supplemental Table for:  
The Log Odds of Positive Lymph Nodes Stratifies and Predicts Survival of High-Risk Individuals Among Stage III Rectal Cancer Patients  
Christina W Lee et al.

Table S1. The LNR and LODDS Models are Correlated Mathematical Constructs.

| LNR groups*  | LODDS groups* |           |           | Total |
|--------------|---------------|-----------|-----------|-------|
|              | LODDS1        | LODDS2    | LODDS3    |       |
| LNR1         | <b>73</b>     | 26        | 5         | 104   |
| LNR2         | 0             | <b>17</b> | 13        | 30    |
| LNR3         | 0             | 0         | <b>30</b> | 30    |
| <b>Total</b> | 73            | 43        | 48        | 164   |

\*Pearson correlation = 0.799,  $p < 0.001$ .

Bold face numbers represent the common number of individuals who stratified into both LNR and LODDS groups by each respective stratification.
